# Supplementary material for: Cooperation and Hamilton's rule in a simple synthetic microbial system
Source: PubMed Central journal article supplement — Mol Syst Biol. 2010 Aug 10;6:398. doi: 10.1038/msb.2010.57 (PMC2950083; doi:10.1038/msb.2010.57), 2010-08-10
Supplement: msb201057-s1.pdf [file msb201057-s1.pdf]

# SUPPLEMENTARY INFORMATION

## Contents

|                                                                                              |   |
|----------------------------------------------------------------------------------------------|---|
| <b>Supplementary text S1: Hamilton’s rule and Price’s covariance formalism</b>               | 2 |
| A. Price equation                                                                            | 2 |
| B. Covariance and regression                                                                 | 3 |
| C. From Price to Hamilton                                                                    | 3 |
| D. Linear models                                                                             | 4 |
| E. Non-linearities and interpretation of $b$                                                 | 4 |
| <b>Supplementary text S2: A model for the dynamics of producer and nonproducer strains</b>   | 5 |
| <b>Supplementary references</b>                                                              | 5 |
| <b>Supplementary figures</b>                                                                 | 6 |
| Figure S1: Simpsons paradox in a simulated population of producers and nonproducers          | 6 |
| Figure S2: Growth of producers and nonproducers as a function of initial producer proportion | 7 |

## Supplementary text S1: Hamilton's rule and Price's covariance formalism

We recall here how Hamilton's rule can be derived using Price's covariance formalism [1,2].

### A. Price equation

Consider a population composed of groups, indexed by  $g$ , themselves composed of individuals, indexed by  $i$ . An individual  $i$  can either be a producer,  $p_i = 1$ , or a non-producer,  $p_i = 0$ . Initially, a group  $g$  contains a fraction  $x_g$  of the total population and has a proportion  $p_g$  of producers; after a given amount of time, the group size is multiplied by a factor  $w_g$ , which is assumed to depend only on  $p_g$  (and not on the absolute size of the groups as it could more generally do).

The so-called Price equation can be written at two levels. At the population level, it gives the overall change in the proportion of producers  $\Delta\bar{p} = \bar{p}' - \bar{p}$ , where  $\bar{p} = \sum_g x_g p_g$  represents the initial proportion, and  $\bar{p}' = \sum x'_g p'_g$ , with  $p'_g = p_g + \Delta p_g$  and  $x'_g = x_g w_g / \sum_h x_h w_h$ , the final proportion (an implicit assumption here is that we are only interested in a mixture of all the groups after a fixed period of time defining a "final" time; otherwise quantities other than the global mean could also be of interest). From these definitions, the following identity, known as the Price equation, follows:

$$\langle w_g \rangle \Delta\bar{p} = \text{Cov}(w_g, p_g) + \langle w_g \Delta p_g \rangle. \quad (1)$$

Here, averages and covariances are taken with weights depending on the initial relative sizes of the groups: for any quantities  $a_g$  and  $b_g$  defined at the group level,  $\langle a_g \rangle = \sum_g x_g a_g$  and  $\text{Cov}(a_g, b_g) = \langle a_g b_g \rangle - \langle a_g \rangle \langle b_g \rangle$ . The second term in Eq. (1) involves  $\Delta p_g$ , the change in proportion of producers within group  $g$ , which can be expressed in terms of a Price equation at the group level:

$$w_g \Delta p_g = \text{Cov}_g(w_i, p_i). \quad (2)$$

Here,  $w_i$  corresponds to the multiplicative factor by which producers (if  $p_i = 1$ ) or non-producers (if  $p_i = 0$ ) are multiplied (at this level,  $x_i = 1$  and  $\Delta p_i = 0$  since the unit is an individual and no conversion between producer and non-producer is assumed).  $\text{Cov}_g(w_i, p_i) = \langle w_i p_i \rangle_g - \langle w_i \rangle_g \langle p_i \rangle_g$  where the subscript  $g$  indicates that averages are taken for individuals  $i$  belonging to the group  $g$ ; in particular, we have by definition  $\langle w_i \rangle_g = w_g$  and  $\langle p_i \rangle_g = p_g$ .

## B. Covariance and regression

Given a set of pairs  $(p_g, w_g)$  with weights  $x_g$  we can always write

$$\text{Cov}(w_g, p_g) = \beta(w_g, p_g)\text{Var}(p_g) \quad (3)$$

where  $\text{Var}(p_g) = \text{Cov}(p_g, p_g) = \langle p_g^2 \rangle - \langle p_g \rangle^2$  is the variance of  $p_g$  and  $\beta(w_g, p_g)$  corresponds to the regression coefficient of  $w_g$  against  $p_g$ .  $\beta(p_g, w_g)$  can also be interpreted as the value of  $\beta$  which minimizes, together with the other regression coefficient  $\alpha$ , the residual sum

$$R^2 = \langle (w_g - (\alpha + \beta p_g))^2 \rangle = \sum_g x_g (w_g - \alpha - \beta p_g)^2. \quad (4)$$

Graphically,  $\beta(p_g, w_g)$  is therefore the slope of the best linear interpolation, in the mean-square sense (using weights  $x_g$ ) of the data points  $(p_g, w_g)$  (see Fig. 3 of main text).

Similarly, we can write

$$\text{Cov}_g(w_i, p_i) = \beta_g(w_i, p_i)\text{Var}_g(p_i). \quad (5)$$

With these substitutions, the condition  $\Delta\bar{p} > 0$  is equivalent to

$$\beta(w_g, p_g)\text{Var}(p_g) + \langle \beta_g(w_i, p_i)\text{Var}_g(p_i) \rangle > 0. \quad (6)$$

## C. From Price to Hamilton

If  $\beta_g(w_i, p_i)$  is independent of  $g$ , corresponding to an intrinsic individual cost independent of the nature of the group  $g$  to which an individual belongs, Eq. (6) can be rewritten

$$\beta(w_g, p_g)r + \beta_g(w_i, p_i) > 0. \quad (7)$$

where

$$r = \frac{\text{Var}(p_g)}{\langle \text{Var}_g(p_i) \rangle} \quad (8)$$

is a purely ‘‘geometrical’’ parameter, that depends only on the initial composition of the groups.

If we consider for instance groups of equal size with a proportion  $p_g$  of producers in each group, we have  $p_i = 1$  with probability  $p_g$  and  $p_i = 0$  with probability  $1 - p_g$ , so that  $\langle p_i^m \rangle_g = p_g$  for all  $m$ , and in particular  $\text{Var}_g(p_i) = p_g - p_g^2$ . In such a case,

$$r = \frac{\langle p_g^2 \rangle - \langle p_g \rangle^2}{\langle p_g \rangle - \langle p_g^2 \rangle}. \quad (9)$$

#### D. Linear models

Eq. (7), known as Hamilton’s rule, is most easily interpretable when the regression coefficients  $\beta(w_g, p_g)$  and  $\beta_g(w_i, p_i)$  are independent of the distribution of the  $p_g$ ’s. In the model introduced in Box 1, it is thus assumed that there is a fixed production cost per individual that is independent from group properties. For this model, we can write the linear relation

$$w_i = a + kp_g - cp_i, \quad (10)$$

where  $a + kp_g$  is the multiplicative factor for non-producers ( $p_i = 0$ ) and  $a + kp_g - c$  for producers ( $p_i = 1$ ) when they are in a group with a proportion  $p_g$  of producers. We have then  $\beta_g(w_i, p_i) \simeq -c$  (see next paragraph) and, since averaging within a group leads to  $w_g = a + (k - c)p_g$ , we have  $\beta(w_g, p_g) = k - c$ . By introducing  $b \equiv k - c$ , we thus obtain Hamilton’s rule under the form  $br - c > 0$ , with  $r$  given by Eq. (8).

When deriving these formulas,  $p_i$  and  $p_g$  should not be treated as independent variables (for instance, if  $p_g = 0$ , then necessarily  $p_i = 0$ ). Introducing  $p_{g-i}$ , the fraction of producers in the subgroup of size  $n_g - 1$  where  $i$  is excluded ( $n_g$  representing the total size of group  $g$ ), we have  $p_g = p_{g-i}(n_g - 1)/n_g + p_i/n_g$ . Therefore,  $w_i = 1 + k(n_g - 1)/n_g p_{g-i} + (k/n_g - c)p_i$  where now, *conditionally on  $p_g$* , the variables  $p_{g-i}$  and  $p_i$  are uncorrelated. We thus get  $\beta_g(w_i, p_i) = -c + k/n_g$ , which simplifies to  $\beta_g(w_i, p_i) \simeq -c$  when the size of the group  $n_g$  is large.

#### E. Non-linearities and interpretation of $b$

In general, the relation between  $w_g$  and  $p_g$  is non linear and the “benefit”  $b = \beta(w_g, p_g)$  depends on the distribution into groups (see Fig. 3 for an illustration). Formally, Eq. (7) still holds but since both  $b$  and  $r$  change when the composition of the group changes, and since the change of  $b = \beta(w_g, p_g)$  cannot be from the current values of  $b$  and  $c$  only, the relation cannot indicate how the direction of selection is affected when the system is perturbed. Only when operating in a regime where  $w_g$  varies linearly with  $p_g$  can a single number,  $b$ , provide a sufficient characterization.

Note also that, even in the linear case, the notion of benefit that enters in Hamilton’s rule is that of a “differential benefit” that addresses only changes in the relative proportion of producers and non-producers: if the relation  $w_g = a + bp_g$  is changed to  $w_g = a' + bp_g$  with  $a' > a$ , there is an (absolute) “benefit” in the sense that the population globally improves its growth, but no (differential) “benefit”, in the sense of Hamilton’s rule, since the ratio between producers and non-producers is not affected. This situation is illustrated with our system in Fig. 3.

## Supplementary text S2: A model for the dynamics of producer and nonproducer strains

We introduce here a simple model for the dynamics of the synthetic producer and nonproducer strains. The population dynamics depend on the concentration of autoinducer,  $AI$ , which is assumed to modulate the growth rate between  $s_{\min}$  and  $s_{\max}$  following

$$s(AI) = s_{\min} + (s_{\max} - s_{\min}) \left( \frac{AI}{AI + K_M} \right), \quad (11)$$

where  $K_M$  is the concentration of autoinducer at which half-maximal response occurs. Assuming a logistic growth with a common carrying capacity  $K$  and an autoinducer dependent growth rate, the dynamics of producers is described by

$$\frac{d[P]}{dt} = s(AI) P \left( 1 - \frac{P + NP}{K} \right), \quad (12)$$

and the dynamics of nonproducers by

$$\frac{d[NP]}{dt} = \kappa s(AI) NP \left( 1 - \frac{P + NP}{K} \right), \quad (13)$$

where  $\kappa > 1$  represents the relative advantage of nonproducers. Finally, the autoinducer production rate is taken to be proportional to number of producers

$$\frac{d[AI]}{dt} = \alpha P. \quad (14)$$

This model is simply focused on the growth dynamics of producers and nonproducers and notably does not explicitly incorporate on/off rates, transport rates, transcription/translation/degradation rates. When this model was simulated using parameter values estimated from experimental data and initial conditions corresponding to our experimental conditions, the simulation qualitatively reproduced the main experimental observations [3]:  $\Delta\bar{p}$  was greater than zero while  $\Delta p_g$  was less than zero for all  $g$  (Supplementary Figure S1). The model also qualitatively reproduces the dependence of growth of producers and nonproducers on  $p_g$  (Supplementary Figure S2).

## Supplementary references

- [1] Price G.R., *Selection and covariance*, Nature 227, 520-521 (1970).
- [2] Hamilton W.D., *Innate social aptitudes of man: an approach from evolutionary genetics*, in ASA Studies 4: Biosocial Anthropology, edited by R. Fox (Malaby Press, London, 1975), pp. 133-153.
- [3] Chuang J.S., Rivoire O., Leibler S., *Simpson's paradox in a synthetic microbial system*, Science 323, 272-275 (2009)

## Supplementary figures

Figure S1: Simpsons paradox in a simulated population of producers and nonproducers

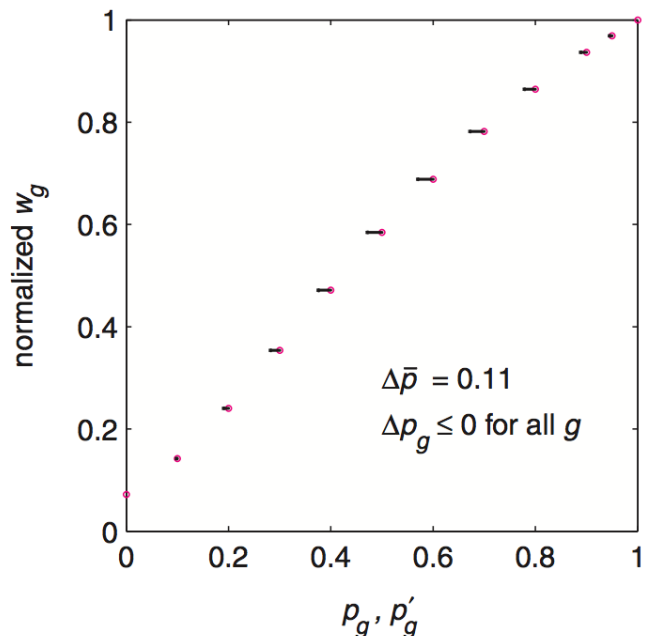

The model described in Supplementary Text S2 was numerically integrated in Matlab using parameters  $K = 4 \times 10^9$  cells/ml,  $K_M = 3 \mu\text{M}$ ,  $s_{\max} = 0.0075 \text{ min}^{-1}$ ,  $s_{\min} = s_{\max}/10$ ,  $\kappa = 1.05$ ,  $\alpha = 3 \times 10^{-16} \text{ mmol cell}^{-1} \text{ min}^{-1}$ . Ten mixed subpopulations, each initially containing  $4 \times 10^7$  cells/ml (representing the 100-fold dilution made at the beginning of an experiment with living cells), were formed with  $p_g = \{0.1, 0.2, 0.3, 0.4, 0.5, 0.6, 0.7, 0.8, 0.9, 0.95\}$ . This distribution is the same as that used in our experiments with living cells. Since the amount of autoinducer in a saturated culture of pure producers is approximately  $30 \mu\text{M}$ , the initial autoinducer concentration in each subpopulation was  $30 \times (p_g/100) \mu\text{M}$ . The system was simulated for 780 min (13 hours), corresponding to the length (12 to 13 hours) of a typical experiment with living cells. The initial producer proportion  $p_g$  of each subpopulation is plotted as a magenta circle and a black line segment connects  $p_g$  to the final producer proportion  $p'_g$ . In agreement with experiments with living cells, Simpsons paradox is observed in the simulation, since  $\Delta p_g \leq 0$  for all  $g$ , but  $\Delta \bar{p} > 0$  globally.

**Figure S2: Growth of producers and nonproducers as a function of initial producer proportion**

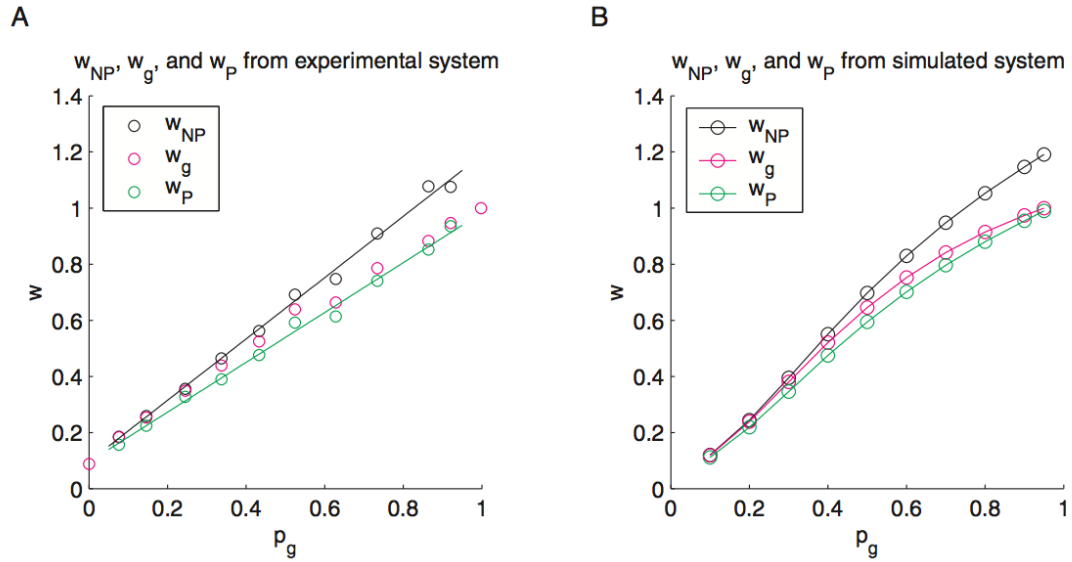

$w_{NP}$  (black) is the same as  $w_-$  of Box 1.  $w_P$  (green) is the same as  $w_+$  of Box 1.  $w_g$  (magenta) is the growth of the subpopulation composed of  $p_g$  producers and  $(1 - p_g)$  nonproducers.

**(A)** Representative sample for experimental data, with lines representing fits from linear regression.

**(B)** Simulated system of Supplementary Figure S1.
